# Supplementary material for: The SEB-1 Transcription Factor Binds to the STRE Motif in Neurospora crassa and Regulates a Variety of Cellular Processes Including the Stress Response and Reserve Carbohydrate Metabolism
Source: PubMed Central journal article supplement (PMC4856084; doi:10.1534/g3.116.028506), 2016-03-16
Supplement: supp_g3.116.028506_FigureS1.pdf [file supp_g3.116.028506_FigureS1.pdf]

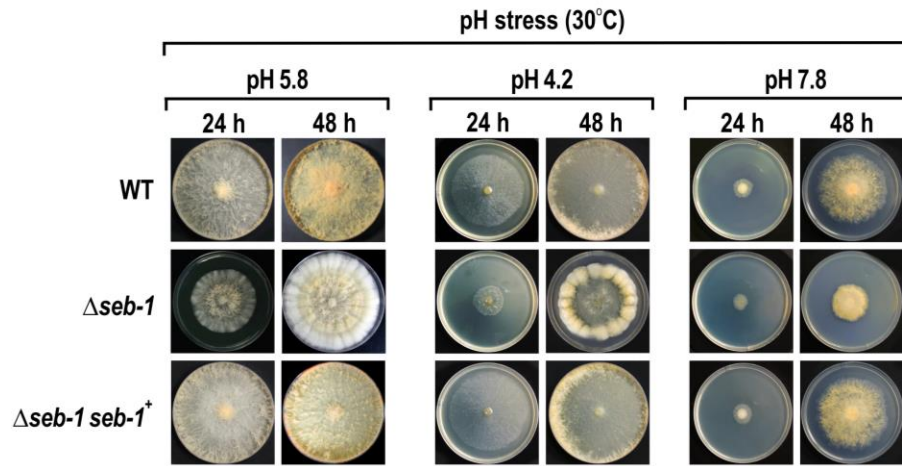

**Figure S1.** The  $\Delta seb-1$  strain is sensitive to pH stress. The sensitivity of the wild-type,  $\Delta seb-1$ , and  $\Delta seb-1$  complemented strains to pH was evaluated by cultivating the strains at 30°C for two days at three different pH values: pH 5.8, 4.2, and 7.2. WT: wild-type strain;  $\Delta seb-1$ : strain mutated in the ORF NCU02671;  $\Delta seb-1 seb-1^+$ :  $\Delta seb-1$  complemented strain ( $\Delta seb-1 his-3::Pccg-1-seb1-sfgfp$ ).
