# Supplementary material for: The SEB-1 Transcription Factor Binds to the STRE Motif in Neurospora crassa and Regulates a Variety of Cellular Processes Including the Stress Response and Reserve Carbohydrate Metabolism
Source: PubMed Central journal article supplement (PMC4856084; doi:10.1534/g3.116.028506), 2016-03-16
Supplement: supp_g3.116.028506_FigureS2.pdf [file supp_g3.116.028506_FigureS2.pdf]

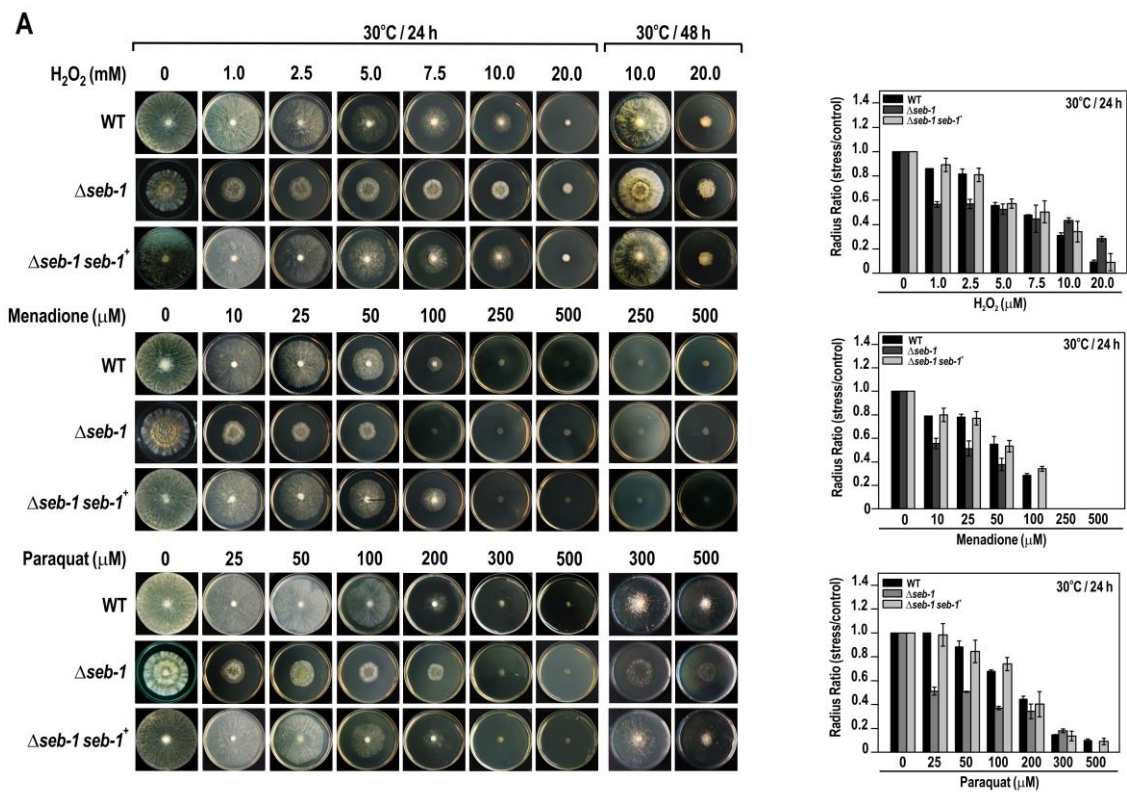

Fig. S2 A

**B**

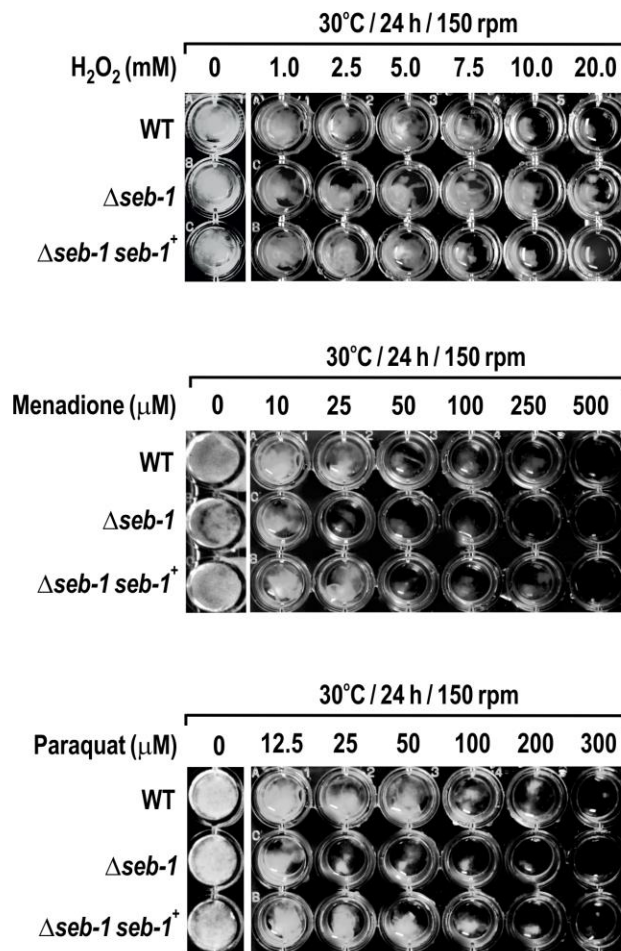

**Fig. S2 B**

**Figure S2.** The  $\Delta seb-1$  strain is sensitive to oxidative stress. The sensitivity of the wild-type,  $\Delta seb-1$ , and  $\Delta seb-1$  complemented strains to agents that induce oxidative stress was evaluated in the presence of hydrogen peroxide, menadione, and paraquat. (A) The strains were inoculated on plates with increasing concentrations of hydrogen peroxide (1 to 20 mM), menadione (10 to 500 mM), and paraquat (25 to 500 mM), and cultivated at 30°C for 24 and 48 h. (B) Growth of the strains was evaluated in liquid VM medium containing varying concentrations of the same agents. WT: wild-type strain;  $\Delta seb-1$ : strain mutated in the ORF NCU02671;  $\Delta seb-1 seb-1^+$ :  $\Delta seb-1$  complemented strain ( $\Delta seb-1 his-3::Pccg-1-seb1-sfgfp$ ).
