# Supplementary material for: The SEB-1 Transcription Factor Binds to the STRE Motif in Neurospora crassa and Regulates a Variety of Cellular Processes Including the Stress Response and Reserve Carbohydrate Metabolism
Source: PubMed Central journal article supplement (PMC4856084; doi:10.1534/g3.116.028506), 2016-03-16
Supplement: supp_g3.116.028506_FigureS3.pdf [file supp_g3.116.028506_FigureS3.pdf]

**A**

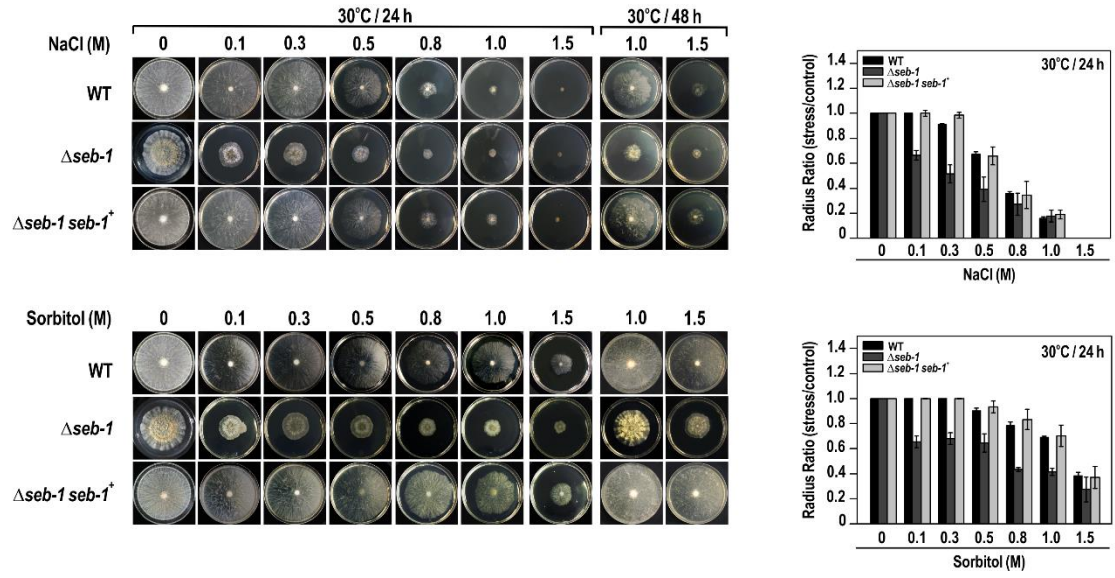

**B**

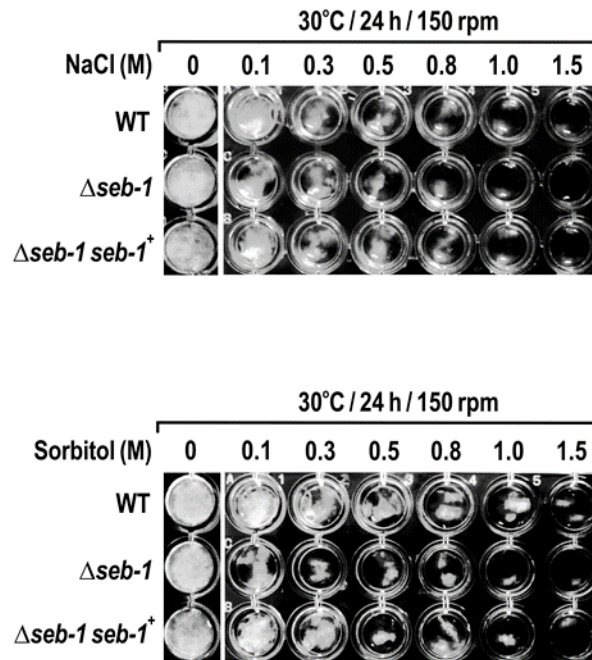

**Figure S3.** The  $\Delta seb-1$  strain is sensitive to high osmolarity. (A) The wild-type,  $\Delta seb-1$ , and  $\Delta seb-1$  complemented strains were inoculated on solid VM medium containing increased concentrations of NaCl (0.1 to 1.5 M) and sorbitol (0.1 to 1.5 M) and cultivated at 30°C for 24 and 48 h. (B) Growth of the strains was evaluated in liquid VM medium containing varying concentrations of NaCl and sorbitol. WT: wild-type strain;  $\Delta seb-1$ : strain mutated in the ORF NCU02671;  $\Delta seb-1 seb-1^+$ :  $\Delta seb-1$  complemented strain ( $\Delta seb-1 his-3::Pccg-1-seb1-sfgfp$ ).
