# Supplementary material for: The SEB-1 Transcription Factor Binds to the STRE Motif in Neurospora crassa and Regulates a Variety of Cellular Processes Including the Stress Response and Reserve Carbohydrate Metabolism
Source: PubMed Central journal article supplement (PMC4856084; doi:10.1534/g3.116.028506), 2016-03-16
Supplement: supp_g3.116.028506_TableS1.pdf [file supp_g3.116.028506_TableS1.pdf]

**Table S1. Oligonucleotides used in this work.**

| <b>Primer</b>                                                       | <b>Sequence</b>                                                    | <b>Source***</b> | <b>Position#</b> |
|---------------------------------------------------------------------|--------------------------------------------------------------------|------------------|------------------|
| <i>Pulldown assays and EMSA*</i>                                    |                                                                    |                  |                  |
| bioSTRE1-1F                                                         | 5'-/BIO/gtaatacgactcTTCA <b>AAGGGG</b> GATTCA <b>AAGGGG</b> GAT-3' | <i>pgsn</i>      | -                |
| bioSTRE1-1R                                                         | 5'-/BIO/gtaatacgactcGTATTCA <b>AAGGGG</b> GATCCC-3'                | <i>pgsn</i>      | -                |
| STRE1-2R                                                            | 5'-AT <b>CCCC</b> CTTGAAT <b>CCCC</b> CTTGAAgagtcgtattac-3'        | <i>pgsn</i>      | -                |
| STRE1-F                                                             | 5'-GGGAT <b>CCCC</b> CTTGAATAC-3'                                  | <i>pgsn</i>      | -1496 to -1513   |
| STRE1-R                                                             | 5'-GTATTCA <b>AAGGGG</b> GATCCC-3'                                 | <i>pgsn</i>      | -1496 to -1513   |
| <i>seb-1 cloning and <math>\Delta</math>seb-1 complementation**</i> |                                                                    |                  |                  |
| SEB1-F                                                              | 5'-CAT <b>ATG</b> GAAAGACATCATGGCTCAG-3'                           | NCU02671         | +1 to +21        |
| SEB1-R                                                              | 5'-GAATT <b>CTCA</b> CTCGCCTCTCCTCCG-3'                            | NCU02671         | +1999 to +2023   |
| CsfGFP <sub>seb1</sub> -F                                           | 5'-CTAGTCTAGACA <b>AAAACATG</b> GAAAGACATCATGGCTC-3'               | NCU02671         | +1 to +19        |
| CsfGFP <sub>seb1</sub> -F                                           | 5'-CCGCTTAAT <b>TC</b> AtcctcctcctcctcctccCTCGCCTCTCCTCCGCTTCTC-3' | NCU02671         | +1999 to +2023   |
| <i>Real-time PCR</i>                                                |                                                                    |                  |                  |
| qGNN-F                                                              | 5'-ACAAGCACCCGAACCCAC-3'                                           | NCU06698         | +1134 to +1151   |
| qGNN-R                                                              | 5'-AAGGGTGGGCGATGCTGT-3'                                           | NCU06698         | +1234 to +1251   |
| qGSN-F                                                              | 5'-TACCAAGCATCACCAACCTCT-3'                                        | NCU06687         | +1541 to +1564   |
| qGSN-R                                                              | 5'-TGTCTGCGGCTTCTGGGTAAAT-3'                                       | NCU06687         | +1689 to +1712   |
| qGPN-F                                                              | 5'-TGCCAATATCGAAATCACCCGCGA-3'                                     | NCU07027         | +2247 to +2061   |
| qGPN-R                                                              | 5'-CTCGATGGCCTCAAACACCTTGA-3'                                      | NCU07027         | +2375 to +2398   |
| qGDN-F                                                              | 5'-GCGCGGTAATCAAGCCA-3'                                            | NCU00743         | +3779 to +3796   |
| qGDN-R                                                              | 5'-TGAATTTGCCGGCTTCGT-3'                                           | NCU00743         | +3935 to +3952   |
| qGBN-F                                                              | 5'-TCTGCGATGCCGAGTTGT-3'                                           | NCU05429         | +1487 to +1504   |
| qGBN-R                                                              | 5'-ACTCGTTGCCCTCGAAGT-3'                                           | NCU05429         | +1616 to +1633   |
| qSEB1-F                                                             | 5'-TTGCAACCGTCGTTTCCG-3'                                           | NCU02671         | +1657 to +1674   |
| qSEB1-R                                                             | 5'-AACTTCTTGCCGCACTCG-3'                                           | NCU02671         | +1741 to +1758   |

|                  |                                   |             |                |
|------------------|-----------------------------------|-------------|----------------|
| 4173ACT-F        | 5'-CCATGTACCCTGGTCTCTCCGAC-3'     | NCU04173    | +1457 to +1479 |
| 4173ACT-R        | 5'-CCACCGATCCAGACGGAGTACTTG-3'    | NCU04173    | +1551 to +1574 |
| <i>ChIP-qPCR</i> |                                   |             |                |
| emsaSTRE1-F      | 5'-CACTGCACAGATCTGGAGGACC-3'      | <i>pgsn</i> | -1590 to -1569 |
| emsaSTRE1-R      | 5'-TCTTGAGACATCCATGGGCATTTTCAG-3' | <i>pgsn</i> | -1433 to -1408 |
| STRE2i-F         | 5'-GCTTCAGTGAGGCCCCCGT-3'         | <i>pgsn</i> | -350 to -333   |
| STRE2i-R         | 5'-GCAGATCAGGTCGACGTAGCC-3'       | <i>pgsn</i> | -205 to -185   |
| pGPNNit-F2       | 5'-CTGGCTGGCTCCGTCTTA-3'          | <i>pgpn</i> | -725 to -704   |
| pGPNNit-R2       | 5'-GAGGTAAGTGGGGCAGTC-3'          | <i>pgpn</i> | -527 to -510   |
| GNNp-F2          | 5'-CGGCCGTTGTTCCATTCA-3'          | <i>pgnn</i> | -954 to -937   |
| GNNp-R3          | 5'-CAACCACCCGGACGAGGAC-3'         | <i>pgnn</i> | -776 to -758   |
| BRANCH-FP3       | 5'-GCCCCTCCATGAAGCGAAGA-3'        | <i>pgbn</i> | -1215 to -1196 |
| BRANCH-RP1       | 5'-TGGTTGGGCTTCTGGGCG-3'          | <i>pgbn</i> | -1133 to -1116 |
| DEBp-F2          | 5'-GCCTGTTTTCTGACGGGT-3'          | <i>pgdn</i> | -707 to -690   |
| DEBp-R2          | 5'-TTGGCTGTGATAGGACCG-3'          | <i>pgdn</i> | -551 to -534   |
| qUbi-F           | 5'-CGAGTCTTCGGATACGATTG-3'        | NCU05995    | +735 to +754   |
| qUbi-R           | 5'-CCATCCTCCAAGTCTTAC-3'          | NCU05995    | +842 to +824   |

\*The STRE1 motifs are represented in bold and the spacer regions in lower cases. The oligonucleotides mSTRE1-F and mSTRE1-R contain the mutated STRE1 core sequence represented in bold. BIO - biotin.

\*\*The ORF NCU02671 ATG start codon and TCA stop codon are represented in bold, respectively, in the SEB-1-F/R and CsfGFPseb1-F/R oligonucleotides. The underlined sequence in the oligonucleotide CsfGFPseb1-F is the *N. crassa* Kozak sequence. The nucleotide sequence encoding 6 glycines is represented in lower cases.

\*\*\*ORFs NCU06687 (*gsn*, glycogen synthase), NCU05429 (*gbn*, 1,4- $\alpha$ -glucan branching enzyme), NCU06698 (*gmn*, glycogenin), NCU07027 (*gpn*, glycogen phosphorylase), NCU00743 (*gdn*, glycogen debranching enzyme), NCU02671 (*seb-1*, SEB-1 zinc finger transcription factor), NCU05995 (*ubi*, ubiquitin). *pgnn*, *pgsn*, *pgbn*, *pgpn*, and *pgdn*-promoter of the genes *gmn*, *gsn*, *gbn*, *gpn*, and *gdn*, respectively.

#The DNA oligonucleotides are positioned according to the ATG start site.
